## CORRESPONDENCE

## References

1. Christopherson R, Beattie C, Frank SM, Norris EJ, Meinert CL, Gottlieb SO, Yates H, Rock P, Parker SD, Perler BA, Williams GM: Perioperative morbidity in patients randomized to epidural or general anesthesia for lower extremity vascular surgery. *ANESTHESIOLOGY* 79:422-434, 1993
2. Tuman KJ, McCarthy RJ, March RJ, DeLaria GA, Patel RV, Ivanovich AD: Effects of epidural anesthesia and analgesia on coagulation and outcome after major vascular surgery. *Anesth Analg* 73:696-704, 1991
3. Hertzner NR, Avellone JC, Farrell CJ, Plecha FR, Rhodes RS, Sharp WV, Wright GF: The risk of vascular surgery in a metropolitan community. *J Vasc Surg* 1:13-21, 1984
4. Bandyk DF, Cato RF, Towne JB: A low flow velocity predicts failure of femoropopliteal and femorotibial bypass grafts. *Surgery* 98:799-807, 1985

Anesthesiology  
80:485, 1994

© 1994 American Society of Anesthesiologists, Inc.  
J. B. Lippincott Company, Philadelphia

5. Rhodes RS, Krasniak CL, Jones PK: Factors affecting length of hospital stay for femoropopliteal bypass: Implications of the DRGs. *N Engl J Med* 314:153-157, 1986
6. Berlaak JF, Abrams JH, Gilmour IJ, O'Connor SR, Knighton DR, Cerra FB: Preoperative optimization of cardiovascular hemodynamics improves outcome in peripheral vascular surgery. *Ann Surg* 289:297, 1991
7. Rosenfeld BA, Beattie C, Christopherson R, Norris EJ, Frank SM, Breslow MJ, Rock P, Parker S, Gottlieb SO, Perler BA, Williams GM, Seidler A, Bell W, The Perioperative Ischemia Randomized Anesthesia Trial Study Group: The effects of different anesthetic regimens on fibrinolysis and the development of postoperative arterial thrombosis. *ANESTHESIOLOGY* 79:435-443, 1993

(Accepted for publication November 3, 1993.)

## Factors Affecting Outcome in Patients Undergoing Peripheral Vascular Surgery: II

*To the Editor:*—The authors of the recent articles comparing general *versus* epidural anesthesia and analgesia for lower extremity vascular surgery are to be commended for the rigorous study they performed.<sup>1,2</sup> It is, however, of concern that protocol failures (patients assigned to epidural anesthesia but given general anesthesia) were treated differently in the analysis of one part compared to the other part, though they involved some of the same patients. In the first part of the study, assessing morbidity and mortality, protocol failures were treated as epidural anesthesia, whereas in the second part of the study investigating etiologic factors, protocol failures were treated as general anesthesia patients. I am curious as to the authors' rationale. Would a more consistent treatment of protocol failures have altered their results? This is pertinent as it appears that three of the patients having protocol failure suffered morbidity, one died, one developed cardiac ischemia, and one required limb amputation, all of which were outcome variables in the first part of the study.

Neal Badner, M.D., F.R.C.P.C.  
Assistant Professor  
Department of Anesthesia

Anesthesiology  
80:485-486, 1994

© 1994 American Society of Anesthesiologists, Inc.  
J. B. Lippincott Company, Philadelphia

*In Reply:*—In all clinical trials, it is necessary first to report results according to treatment assignment, that is, according to the group to which patients were randomized.<sup>1</sup> This is because it is always possible that there may be some inherent risk caused simply by being assigned to a particular treatment group and that this risk may be

University Hospital  
339 Windermere Road  
London, Ontario  
Canada N6A 5A5

## References

1. Christopherson R, Beattie C, Frank SM, Norris EJ, Meinert CL, Gottlieb SO, Yates H, Rock P, Parker SD, Perler BA, Williams GM: Perioperative morbidity in patients randomized to epidural or general anesthesia for lower extremity vascular surgery. *ANESTHESIOLOGY* 79:422-434, 1993
2. Rosenfeld BA, Beattie C, Christopherson R, Norris EJ, Frank SM, Breslow MJ, Rock P, Parker S, Gottlieb SO, Perler BA, Williams GM, Seidler A, Bell W, The Perioperative Ischemia Randomized Anesthesia Trial Study Group: The effects of different anesthetic regimens on fibrinolysis and the development of postoperative arterial thrombosis. *ANESTHESIOLOGY* 79:435-443, 1993

(Accepted for publication November 3, 1993.)

overlooked by investigators. For instance, in this study, as soon as investigators knew patients were randomized to epidural anesthesia, hypertension may have been treated differently compared to patients randomized to general anesthesia. Patients about to receive regional anesthesia would be expected to have a sympathectomy; therefore,

## CORRESPONDENCE

long-acting vasodilators would not be given intravenously to control blood pressure, which would be expected to decrease with the regional technique. Thus, it is possible that patients were put at some risk because of differences in initial treatment of high blood pressure.

The paper by Christopherson *et al.*<sup>2</sup> provides the initial analysis of outcomes from the study. Therefore, analysis in that paper is intentionally to treat. A second statistical analysis was performed in which the patients who were randomized to epidural anesthesia but who received general anesthesia were assigned to the general anesthesia group. Changing groups for these four patients did not alter any of the major outcomes of the trial.

The study by Rosenfeld *et al.*<sup>3</sup> is not the primary analysis, and therefore, it is permissible to analyze by treatment administered rather than by randomization. Since Rosenfeld *et al.* were studying mechanisms of perioperative thrombosis, the most rational and appropriate analysis is by treatment administration rather than treatment assignment. This provides a more accurate assessment of anesthetic effects on changes in fibrinolysis.

**Rose Christopherson, M.D., Ph.D.**  
Assistant Professor

**Brian A. Rosenfeld, M.D.**  
Assistant Professor

Anesthesiology  
80:486, 1994  
© 1994 American Society of Anesthesiologists, Inc.  
J. B. Lippincott Company, Philadelphia

## Factors Affecting Outcome in Patients Undergoing Peripheral Vascular Surgery: III

*To the Editor:*—The conclusion by Christopherson *et al.*<sup>1</sup> that "... epidural anesthesia is associated with a lower incidence of reoperation for inadequate tissue perfusion and therefore may be advantageous for this surgical population" is rather noncompelling. Of concern are the data in table 2 that demonstrate that above-the-ankle amputation was not decreased in a statistically significant manner in patients before discharge, nor was the 6-month vascular surgery outcome (amputation, regrafting, or thrombectomy) altered in patients who received epidural *versus* general anesthesia. Furthermore, the authors never state whether the patients were matched for the severity of their vascular disease.

In summary, I will find it very difficult to alter my clinical practice until more convincing data is forthcoming on the matter.

Department of Anesthesiology and Critical Care Medicine  
The Johns Hopkins Hospital  
600 North Wolfe Street  
Baltimore, Maryland 21287

### References

1. Meinert CL: Data analysis requirements and procedures, *Clinical Trials: Design, Conduct, and Analysis*. New York, Oxford University, 1986, pp 185–197
2. Christopherson R, Beattie C, Frank SM, Norris EJ, Meinert CL, Gottlieb SO, Yates H, Rock P, Parker SD, Perler BA, Williams GM: Perioperative morbidity in patients randomized to epidural or general anesthesia for lower extremity vascular surgery. *ANESTHESIOLOGY* 79: 422–434, 1993
3. Rosenfeld BA, Beattie C, Christopherson R, Norris EJ, Frank SM, Breslow MJ, Rock P, Parker S, Gottlieb SO, Perler BA, Williams GM, Seidler A, Bell W, The Perioperative Ischemia Randomized Anesthesia Trial Study Group: The effects of different anesthetic regimens of fibrinolysis and the development of postoperative arterial thrombosis. *ANESTHESIOLOGY* 79:435–434, 1993

(Accepted for publication November 3, 1993.)

**Lucy Waskell, M.D., Ph.D.**  
Anesthesiology Service (129)  
Veterans Administration Medical Center  
and University of California, San Francisco  
4150 Clement Street  
San Francisco, California 94121

### Reference

1. Christopherson R, Beattie C, Frank SM, Norris E, Meinert C, Gottlieb S, Yates H, Rock P, Parker S, Perler B, Williams GM: Perioperative morbidity in patients randomized to epidural or general anesthesia for lower extremity vascular surgery. *ANESTHESIOLOGY* 79: 422–434, 1993

(Accepted for publication November 16, 1993.)
